# Supplementary material
Source: PubMed Central journal article supplement (PMC5341602)
Supplement: NIHMS841777-supplement.pdf [file NIHMS841777-supplement.pdf]

**SUPPLEMENTAL TABLE 1. International Classification of Diseases Codes used to Electronically Identify Comorbidities**

| <b>Comorbidity</b>          | <b>ICD-9 Codes</b>                                                      | <b>Percent Agreement<sup>a</sup></b> |
|-----------------------------|-------------------------------------------------------------------------|--------------------------------------|
| Hypertension                | 401-405, 437.2<br>642.0-642.2                                           | 90%                                  |
| Diabetes                    | 250                                                                     | 94%                                  |
| Myocardial infarction       | 410, 412                                                                | 82%                                  |
| Chronic pulmonary disease   | 494-496<br>500-505, 506.4                                               | 88%                                  |
| Peripheral vascular disease | 440.20, 440.22-440.8, 442<br>443.1-443.80, 443.82-443.9<br>785.4, V43.4 | 83%                                  |
| Cerebrovascular disease     | 430-438                                                                 | 83%                                  |
| Liver disease               | 452, 453.0<br>456.0-456.21<br>571.2, 571.4-571.6<br>572.2-572.8         | 97%                                  |
| Renal disease               | 582.0-582.8, 583.0-583.7<br>585.3-585.6                                 | 89%                                  |

|                        |                                                   |     |
|------------------------|---------------------------------------------------|-----|
| Rheumatologic disease  | 710.0, 710.1, 710.4<br>714.0-714.2, 714.81<br>725 | 96% |
| Malignancy             | 140-172, 174-195.8<br>200-208                     | 85% |
| Metastatic solid tumor | 196-198.1, 198.3-199                              | 97% |
| Dementia               | 290<br>331.0-331.2, 331.6-331.8                   | 96% |
| Hemiplegia/paraplegia  | 342, 344                                          | 98% |

---

<sup>a</sup>Percent agreement of electronically ascertained comorbidities compared to manually abstracted data in a cohort of 1418 patients with incident heart failure. Electronic data consist of the occurrence of at least 2 codes within a comorbidity code group within 5 years prior to and including the index heart failure date.
